# Supplementary material
Source: PubMed Central journal article supplement (PMC5728464)
Supplement: ba007302-suppl1.pdf [file ba007302-suppl1.pdf]

| <b>Probe target</b>           | <b>Chromosome location</b> | <b>Manufacturer</b>          |
|-------------------------------|----------------------------|------------------------------|
| <i>TP53</i>                   | 17p13.1                    | Abbott Molecular             |
| <i>ATM</i>                    | 11q22.3                    | Abbott Molecular             |
| <i>DI2Z3</i>                  | 12 centromere              | Abbott Molecular             |
| <i>D13S319 (LAMP control)</i> | 13q14.3                    | Abbott Molecular             |
| <i>BCL6 (break-apart)</i>     | 3q27                       | Abbott Molecular             |
| <i>CMYC (break-apart)</i>     | 8q24                       | Abbott Molecular or Poseidon |
| <i>SEC63 and/or MYB</i>       | 6q21/6q23                  | Kreatech or Poseidon         |
| <i>REL (DIRC1 control)</i>    | 2p16/2q32.1                | Empire Genomics              |
| <i>IGH/CCND1</i>              | 14q32.3/11q13.3            | Abbott Molecular             |

**Table S1: FISH probes.** Hybridizations were performed according to the manufacturer's directions. All patients included in the study received this panel testing, with the exception of the CCND1/IGH probes if the patient had this test performed on a previous sample and REL/DIRC1 if there was insufficient sample.

| Patient | Classification for Discontinuation | FISH nomenclature                                                                                                                                                                                                                                                                                                             |
|---------|------------------------------------|-------------------------------------------------------------------------------------------------------------------------------------------------------------------------------------------------------------------------------------------------------------------------------------------------------------------------------|
| 1       | CLL                                | nuc<br>ish(RELx3~7,DIRCx3~6)[72/200],(BCL6x4)[58/247]/(BCL6x3)<br>[11/247],(SEC63x1)[158/206],(MYCx4)[129/245]/(MYCx3)[57/2<br>45],(ATMx2,TP53x1)[162/219]/(ATMx4,TP53x3)[45/219],(D12Z<br>3x3,D13S319x2)[62/237]/(D12Z3x4,D13S319x2)[62/327]/(D12Z<br>3x2,D13S319x1)[52/237]                                                 |
| 2       | Richter's                          | nuc<br>ish(RELx6,DIRC1x4)[48/200]/(REL,DIRC1)x4[47/200],(BCL6x4<br>)<br>[110/200],(MYBx4,ATMx4,TP53x2)[110/200]/(MYBx2,ATMx2,<br>TP53x1)[83/200],(MYCx4)[120/200],(CCND1x4,IGHx3)[120/200<br>],(D12Z3,D13S319)x4[111/200]                                                                                                     |
| 3       | Richter's                          | nuc ish(BCL6x4)[16/217],(SEC63x2,MYCx3)[13/218]/(SEC63x2,<br>MYCx4)[18/218],(ATMx1,TP53x2)[46/221]/(ATMx4,TP53x2)[1<br>2/221]/(ATMx4,TP53x3)[7/221],(D12Z3x2,D13S319x1)[41/235]/<br>(D12Z3,D13S319)x4[25/235]                                                                                                                 |
| 4       | Richter's                          | nuc<br>ish(BCL6x3)[84/231]/(BCL6x4)[52/231],(SEC63x4)[143/203],<br>(MYCx4)[90/264]/(MYCx5)[41/264]/(5'MYCx6,3'MYCx4)(5'M<br>YC con<br>3'MYCx4)[18/264],(ATMx4,TP53x2)[112/216],(D12Z3x4,<br>D13S319x3,LAMPx3)[90/259]/(D12Z3x5,D13S319x3,LAMPx3)[<br>47/259]/(D12Z3x3,D13S319x2,LAMPx2)[14/259]                               |
| 5       | Richter's                          | nuc ish(REL,DIRC1)x4[74/200],(BCL6x4)(5'BCL6 sep<br>3'BCL6x2) [12/238]/(5'BCL6x4,3'BCL6x5)(5'BCL6 con<br>3'BCL6x2)[10/238]/ (5'BCL6x3, 3'BCL6x5)(5' BCL6 con<br>3'BCL6x2)[10/238]/(BCL6x2) (5'BCL6 sep<br>3'BCL6x1)[3/238],(SEC63,MYC)x4[31/231],(CCND1,<br>IGH)x4[26/226],<br>(ATM,TP53)x4[28/229],(D12Z3,D13S319)x4[29/229] |
| 6       | Richter's                          | nuc ish(BCL6x4)[17/217],(SEC63x4)[12/222],(MYCx6)[29/239]<br>/(MYCx3) [6/239]/(MYCx4)[4/239],(CCND1,IGH)x4[12/212],<br>(ATMx4,TP53x2)[11/225]/(ATMx2,TP53x1)[184/225],(D12Z3x3<br>,D13S319x4,LAMPx4)[19/221]/(D12Z3,D13S319,LAMP)x4[4/22<br>1]                                                                                |
| 7       | Richter's                          | nuc<br>ish(BCL6x4)[28/228],(SEC63x3)[32/244],(MYCx3)[162/272]/<br>(MYCx6)[54/272],(CCND1x2,IGHx3)[128/234]/(CCND1x4,IGH<br>x6)[42/234],(ATMx2,TP53x1)[170/250]/(ATMx4,TP53x2)[37/25<br>0],(D12Z3,D13S319)x4[37/237]                                                                                                           |

|   |   |                                                                                                                                                                                                                                                                                                                                                                                                                                                                                                        |
|---|---|--------------------------------------------------------------------------------------------------------------------------------------------------------------------------------------------------------------------------------------------------------------------------------------------------------------------------------------------------------------------------------------------------------------------------------------------------------------------------------------------------------|
| 8 | - | <p>nuc<br/> ish(BCL6x4)[152/227],(SEC63,MYC)x4[151/226]/(SEC63,MYC)x3[20/226]/(SEC63x3,MYCx4)[9/226]/(SEC63x2,MYCx3)[8/226]/(SEC63x2,MYCx4)[8/226],(MYBx3,ATMx2,TP53x2)[191/377]/(MYBx4,ATMx2,TP53x2)[98/377],(MYBx2,ATMx1,TP53x1)[41/377],(D12Z3,D13S319)x4[209/331]/(D12Z3x4,D13S319x2)[29/331],(D12Z3,D13S319)x3[10/331]/(D12Z3x3,D13S319x4)[22/331],(3'IGHx3,5'IGHx2)(3'IGH con 5'IGHx1) (3'IGH con 5'IGH dimx1)[155/215]/(3'IGHx4,5'IGHx2) (3'IGH con 5'IGHx1)(3'IGH con 5'IGH dimx1)[18/215]</p> |
| 9 | - | <p>nuc<br/> ish(BCL6x4)[25/225],(SEC63,MYC)x4[32/232],(ATMx2,TP53x1)<br/> )<br/> [142/226]/(ATMx4,TP53x2)[29/226],(D12Z3x4,D13S319x3,LAMPx3)[21/228]/(D12Z3,D13S319,LAMP)x4[7/228]</p>                                                                                                                                                                                                                                                                                                                 |

**Table S2. FISH results for patients with near-tetraploidy in CLL.**

| Patient | Classification for Discontinuation | Karyotype                                                                                                                                                                                                                                                                                    |
|---------|------------------------------------|----------------------------------------------------------------------------------------------------------------------------------------------------------------------------------------------------------------------------------------------------------------------------------------------|
| 1       | CLL                                | 44,XY,del(9)(p22),psu dic(17;6)(p13;q21),dic(18;20)(p11.2;p11.2)[cp12]/45,sl,add(X)(q28),+add(9)(p22),-del(9)(p22),dic(15;21)(p11.2;p11.2),+18,-dic(18;20),+20,+mar1[2]/ <b>90-91,sdl1x2,+add(X),+add(X),-Y,+add(9)(q22)x4,-add(9)(p22),-add(9)(p22),+mar2[2]/44,sl,del(13)(q12q21.2)[5]</b> |
| 2       | Richter's                          | <b>44,XY,psu dic(7;3)(3qter&gt;3q21::?:3q21&gt;3p21::?:7p15&gt;7qter),add(9)(q34),-17,add(21)(p11.2)[cp11,one is 4n]/43,sl,inv(12)(p13q24.1),dic(14;18)(p11.1;p11.1)[cp15]/46,XY[1]</b>                                                                                                      |
| 3       | Richter's                          | <b>44-45,X,-Y,-2,+del(3)(p21),-6,-9,add(11)(q13),del(11)(q21),-17,-21,+mar1,+mar2,+mar3[cp6,one is 4n]/82-86&lt;4n&gt;,XXYY,+X,-1,add(3)(q27)x2,-6,-6,der(9)(q10)x2,-14,-14,-15,-15,-16,add(21)(q22)x2,+mar4,+mar5 [cp3]/46,XY[7]/nonclonal[4]</b>                                           |
| 4       | Richter's                          | <b>77-82&lt;4n&gt;,XX,-Y,-Y,-1,-3,add(3)(p25),-8,add(8)(p11.2)[4],-9,-9,-10,-12,del(12)(p12),-13,-14,add(14)(p13)[3],-15,-15,i(17)(q10)x2,-18[4],-20,+21[5],add(21)(p13),-22[8],add(22)(p13),+mar1,+mar2,+mar3,+mar4,+mar5[cp11]/46,XY[9]</b>                                                |
| 5       | Richter's                          | <b>89-90&lt;4n&gt;,XXYY,der(1)del(1)(p13p31)del(1)(q32q42),-4,-5,-8,-9,-18,+mar1,+mar2[cp2]/93-112&lt;4n&gt;,XXYY,+add(1)(q13)[cp2]/46,XY[12]/nonclonal[4]</b>                                                                                                                               |
| 6       | Richter's                          | 43-44,X,-Y,der(2)t(2;11)(q13;q13),der(11)del(11)(p11.2p13)t(2;11)(q13;q13),-14,-15,der(17)t(15;17)(q13;p11.2),+der(?)t(?;Y)(?;q11.2)[cp13]/ <b>82-87,slx2,+Y,+Y,add(1)(q42)x2,add(4)(p16)x2,-12,-der(?)t(?;Y),-der(?)t(?;Y)[cp4]/44,sl,+8[2]/nonclonal[1]</b>                                |
| 7       | Richter's                          | 46,XX,t(14;19)(q32.3;q13.2),der(17)t(8;17)(q13;p11.2),del(20)(q11.2)[cp15]/ <b>91,slx2,-6[cp3]/91,sdl1,+der(17)t(8;17),-19[cp2]</b>                                                                                                                                                          |
| 8       | -                                  | 45,XX,del(11)(q13q23),dic(13;18)(p11.2;p11.2),i(17)(q10)[2]/45,sl,+add(11)(q13),-del(11)[3]/ <b>88-89,sdl1x2,-14[cp2]/87,slx2,add(3)(p21),-14,-15[cp4]/85-88,slx2,-6,-14[cp8]/46,XX[2]</b>                                                                                                   |
| 9       | -                                  | <b>45,XX,der(4)t(4;17)(p16;q21),-17[cp6,one is 4n]/45,sl,del(3)(p21),der(12)t(12;14)(q24.1;q24),der(14)t(3;14)(q21;q11.2)[cp5]/86-88,slx2,-3,der(14)t(3;14)(p21;q22)ins(14;?)(q22;?)-15[cp5]/45,sl,add(X)(p22.1),t(1;5)(p13;q13),t(3;11)(q29;q21),add(10)(q24),add(21)(q22.3)[3]</b>         |

**Table S3: Complete karyotypes of near-tetraploid patients.** Near-tetraploidy clones are in bold.

| Patient | Classification for Discontinuation | REL   | BCL6  | SEC63 or MYB | MYC   | ATM/ TP53 | D12Z3/ D13S319 | CCND1/ IGH |
|---------|------------------------------------|-------|-------|--------------|-------|-----------|----------------|------------|
| 1       | CLL                                | 36.0% | 23.5% | 23.3%        | 52.7% | 20.5%     | 19%            | ND         |
| 2       | Richter's                          | 47.5% | 55.0% | 55.0%        | 60.0% | 55.0%     | 55.5%          | 60%        |
| 3       | Richter's                          | 9.5%  | 7.4%  | 8.3%         | 8.3%  | 8.6%      | 10.6%          | ND         |
| 4       | Richter's                          | 37.0% | 58.8% | 70.4%        | 56.4% | 51.9%     | 52.9%          | ND         |
| 5       | Richter's                          | 19.0% | 13.4% | 13.4%        | 13.4% | 12.2%     | 12.6%          | 11.50%     |
| 6       | Richter's                          | 12.0% | 7.8%  | 5.4%         | 13.8% | 4.9%      | 10.4%          | 5.70%      |
| 7       | Richter's                          | ND    | 12.3% | 13.1%        | 19.9% | 14.8%     | 15.6%          | 17.90%     |
| 8       | -                                  | 78.0% | 67.0% | 74.3%        | 74.3% | 76.7%     | 81.6%          | 80.50%     |
| 9       | -                                  | 14.0% | 11.1% | 13.8%        | 13.8% | 12.8%     | 12.3%          | ND         |

**Table S4: Percentage of cells for each probe set interpreted as having a near-tetraploid signal pattern in the near-tetraploid patients.** A count was interpreted as being near-tetraploidy if one of the following conditions was met: there were 4 signals present for a probe, the count was a doubling of a diploid clone count, or the percentage of the count was consistent with the tetraploid clone size seen with other probes. Abbreviation: ND, not done

| Outcome                 | Total<br>(n = 297) | Not near-<br>tetraploid<br>(n = 288) | Near-tetraploid<br>(n = 9) | P-value |
|-------------------------|--------------------|--------------------------------------|----------------------------|---------|
| Cuminc: CLL Progression |                    |                                      |                            |         |
| Number of Events        | 52                 | 51                                   | 1                          |         |
| % at 1y (95% CI)        | 0.7 (0.1-2.3)      | 0.7 (0.1-2.4)                        | 0                          | 0.41    |
| % at 2y (95% CI)        | 5.2 (3.0-8.1)      | 5.3 (3.1-8.4)                        | 0                          |         |
| % at 3y (95% CI)        | 11.1 (7.7-15.2)    | 11.1 (7.6-15.3)                      | 11.1 (0.2-44.9)            |         |
| % at 4y (95% CI)        | 19.7 (14.7-25.3)   | 20.1 (14.9-25.8)                     | 11.1 (0.2-44.9)            |         |
| Cuminc: Transformation  |                    |                                      |                            |         |
| Number of Events        | 28                 | 22                                   | 6                          |         |
| % at 1y (95% CI)        | 4.7 (2.7-7.6)      | 3.8 (2.0-6.5)                        | 33.3 (6.7-64.0)            | <0.0001 |
| % at 2y (95% CI)        | 7.5 (4.9-10.9)     | 6.3 (3.9-9.6)                        | 44.4 (11.7-73.6)           |         |
| % at 3y (95% CI)        | 9.4 (6.3-13.1)     | 7.6 (4.8-11.1)                       | 66.7 (23.5-89.3)           |         |
| % at 4y (95% CI)        | 9.9 (6.7-13.7)     | 8.1 (5.2-11.7)                       | 66.7 (23.5-89.3)           |         |
| Cuminc: Other Event     |                    |                                      |                            |         |
| Number of Events        | 72                 | 72                                   | 0                          |         |
| % at 1y (95% CI)        | 13.2 (9.6-17.3)    | 13.6 (9.9-17.8)                      | 0                          | 0.08    |
| % at 2y (95% CI)        | 18.4 (14.2-23.0)   | 18.9 (14.6-23.7)                     | 0                          |         |
| % at 3y (95% CI)        | 23.7 (18.9-28.8)   | 24.5 (19.5-29.7)                     | 0                          |         |
| % at 4y (95% CI)        | 24.8 (19.9-30.1)   | 25.6 (20.5-31.1)                     | 0                          |         |
| Overall Survival        |                    |                                      |                            |         |
| Number of Events        | 86                 | 81                                   | 5                          |         |
| Median, years (95% CI)  | NR                 | NR                                   | 2.5 (0.7-NR)               |         |
| % at 1y (95% CI)        | 87.2 (82.8-90.5)   | 87.5 (83.1-90.8)                     | 77.8 (36.5-93.9)           | 0.08    |
| % at 2y (95% CI)        | 80.4 (75.4-84.5)   | 80.8 (75.8-84.9)                     | 66.7 (28.2-87.8)           |         |
| % at 3y (95% CI)        | 73.0 (67.5-77.8)   | 73.9 (68.3-78.7)                     | 44.4 (13.6-71.9)           |         |
| % at 4y (95% CI)        | 69.0 (62.8-74.4)   | 69.8 (63.4-75.2)                     | 44.4 (13.6-71.9)           |         |

**Table S5. In a cumulative incidence analysis, near-tetraploidy was significantly associated with transformation on ibrutinib.** Associations were tested using Gray's test for cumulative incidence or the log-rank test for overall survival. Transformations include 1 peripheral T cell lymphoma, 1 composite B and T cell lymphoma, 1 plasmablastic lymphoma, 1 Hodgkin lymphoma, 1 prolymphocytoid progression, and 23 cases with diffuse large B cell lymphoma. All near-tetraploid transformations were diffuse large B cell lymphoma. Abbreviations: Tx, treatment, Cuminc, cumulative incidence, y, year(s)
